# Supplementary material for: The drag effects of energy-water constraints on China’s economic growth under carbon mitigation goals
Source: Frontiers journal article supplement (doi:10.3389/feart.2022.1059903), 2023-01-13
Supplement: Data_Sheet_1.xlsx [file Data_Sheet_1.xlsx]

## Sheet: Partial original data
	GDP(Hundred million yuan)																				Total water supply(100 million Cbm)																				Total energy consumption(10 thousand Tce)
Region	2000	2001	2002	2003	2004	2005	2006	2007	2008	2009	2010	2011	2012	2013	2014	2015	2016	2017	2018	2019	2000	2001	2002	2003	2004	2005	2006	2007	2008	2009	2010	2011	2012	2013	2014	2015	2016	2017	2018	2019	2000	2001	2002	2003	2004	2005	2006	2007	2008
Beijing	3161.66	3707.96	4315	5007.21	6033.21	6969.52	8117.78	9846.81	11115	12153	14113.6	16251.9	17879.4	19800.8	21330.8	23014.6	25669.1	28014.9	33106	35445.1	40.4	38.93	34.62	35	34.55	34.5	34.2967	34.805	35.08	35.4994	35.1965	36	35.88	36.38	37.491	38.2	38.8083	39.5	39.3	41.7	4212	4313	4503	4708	5139.6	5522	5904	6285	6327
Tianjin	1701.88	1919.09	2150.76	2578.03	3110.97	3905.64	4462.74	5252.76	6719.01	7521.85	9224.46	11307.3	12893.9	14442	15726.9	16538.2	17885.4	18549.2	13362.9	14055.5	22.64	19.14	19.96	20.525	22.06	23.09	22.96	23.37	22.33	23.3701	22.4856	23.1	23.13	23.756	24.0869	25.7	27.2307	27.5	28.4	28.4	2794	2918	3022	3215	3696.68	4085	4500	4943	5364
Hebei	5043.96	5516.76	6018.28	6921.29	8477.63	10012.1	11467.6	13607.3	16012	17235.5	20394.3	24515.8	26575	28443	29421.2	29806.1	32070.5	34016.3	32494.6	34978.6	212.16	211.23	211.382	199.827	195.9	201.78	204	202.5	195.02	193.717	193.681	195.97	195.31	191.287	192.819	187.2	182.574	181.6	182.4	182.3	9893	10391	11588	13477	17347.8	19836	21794	23585	24322
Shanxi	1845.72	2029.53	2324.8	2855.23	3571.37	4230.53	4878.61	6024.45	7315.4	7358.31	9200.86	11237.5	12112.8	12665.2	12761.5	12766.5	13050.4	15528.4	15958.1	16961.6	56.36	57.58	57.4957	56.2412	55.88	55.72	59.2854	58.7423	56.92	56.2726	63.7761	74.18	73.3882	73.7682	71.3749	73.6	75.5257	74.9	74.3	76	6735	7968	9339	10387	11250.9	12750	14098	15601	15675
Inner Mongolia	1539.12	1713.81	1940.94	2388.38	3041.07	3905.03	4944.25	6423.18	8496.2	9740.25	11672	14359.9	15880.6	16916.5	17770.2	17831.5	18632.6	16103.2	16141	17212.5	172.24	175.83	178.232	166.895	171.48	174.76	178.691	180.039	175.78	181.251	181.904	184.7	184.353	183.224	182.011	185.8	190.291	188	192.1	190.9	3540	4073	4560	5218	7622.54	9666	11221	12777	14100
Liaoning	4669.06	5033.08	5458.22	6002.54	6736.12	8123.13	9388.89	11249	13745.3	15288.7	18528.6	22301.5	24882.6	27246.2	28612.3	28555.6	21896.2	23409.2	23510.5	25115	136.36	128.77	127.13	128.321	130.23	133.26	141.24	142.87	142.78	142.79	143.67	144.56	142.23	142.13	141.77	140.8	135.39	131.1	130.3	130.3	10766	10656	10599	11449	13074.1	13611	14987	16544	17801
Jilin	1951.51	2120.35	2348.54	2662.08	3122.01	3620.27	4275.12	5284.69	6426.1	7278.75	8667.58	10568.8	11939.2	13046.4	13803.1	14063.1	14776.8	14944.5	11253.8	11726.8	113.46	105.1	111.69	104	99.19	98.39	102.9	100.78	104.08	111.09	120.04	27.09	129.82	131.48	132.98	133.6	132.54	126.7	119.5	115.4	3655	3863	4353	4991	5602.51	5315	5908	6557	7221
Heilongjiang	3151.4	3390.13	3637.2	4057.4	4750.6	5513.7	6211.8	7104	8314.37	8587	10368.6	12582	13691.6	14454.9	15039.4	15083.7	15386.1	15902.7	12846.5	13544.4	296.75	287.53	252.28	245.81	259.44	271.51	286.21	291.37	297.01	316.251	325.003	352.36	358.901	362.296	364.129	355.3	352.636	353.1	343.9	310.4	6166	6037	6004	6714	7465.67	8050	8731	9377	9979
Shanghai	4771.17	5210.12	5741.03	6694.23	8072.83	9247.66	10572.2	12494	14069.9	15046.5	17166	19195.7	20181.7	21818.2	23567.7	25123.5	28178.7	30633	36011.8	37987.6	108.38	106.23	104.27	108.99	118.14	121.28	118.568	120.192	119.77	125.202	126.288	124.5	115.98	123.209	105.917	103.8	104.837	104.8	103.4	100.9	5492	5818	6119	6698	7405.64	8225	8876	9670	10207
Jiangsu	8553.69	9456.84	10606.9	12442.9	15003.6	18598.7	21742	26018.5	30982	34457.3	41425.5	49110.3	54058.2	59753.4	65088.3	70116.4	77388.3	85869.8	93207.6	98656.8	445.6	466.38	478.74	433.467	525.58	519.72	546.382	558.341	558.32	549.23	552.195	556.2	552.233	576.689	591.295	574.5	577.402	591.3	592	619.1	8612	8881	9609	11060	13651.7	17167	19041	20948	22232
Zhejiang	6141.03	6898.34	8003.67	9705.02	11648.7	13417.7	15718.5	18753.7	21462.7	22990.3	27722.3	32318.8	34665.3	37756.6	40173	42886.5	47251.4	51768.3	58003	62462	201.15	205.36	208.004	205.981	207.77	209.91	208.264	210.977	216.62	197.764	203.039	222.24	198.123	198.334	192.868	186.1	181.147	179.5	173.8	165.8	5967	6530	7386	8525	10824.7	12032	13219	14524	15107
Anhui	2902.09	3246.71	3519.72	3923.1	4759.32	5350.17	6112.5	7360.92	8851.66	10062.8	12359.3	15300.6	17212	19229.3	20848.8	22005.6	24407.6	27018	34010.9	36845.5	176.69	192.99	199.83	178.56	209.7	208.03	241.87	232.05	266.36	291.856	293.12	294.63	292.637	296.02	272.09	288.7	290.65	290.3	285.8	277.7	4879	5118	5316	5842	6016.89	6506	7069	7739	8325
Fujian	3764.54	4072.85	4467.55	4983.67	5763.35	6554.69	7583.85	9248.53	10823	12236.5	14737.1	17560.2	19701.8	21868.5	24055.8	25979.8	28519.2	32182.1	38687.8	42326.6	176.44	176.41	182.86	182.78	184.9	186.86	187.25	196.28	198.04	201.44	202.453	208.82	200.076	204.828	205.629	201.3	189.062	192	186.9	177.5	2943	3163	3615.33	4062.55	5448.7	6142	6828	7587	8254
Jiangxi	2003.07	2175.68	2450.48	2807.41	3456.7	4056.76	4820.53	5800.25	6971.05	7655.18	9451.26	11702.8	12948.9	14410.2	15714.6	16723.8	18499	20006.3	22716.5	24667.3	217.64	210.92	202.06	172.5	203.52	208.05	205.675	234.868	234.21	241.25	239.746	262.86	242.54	264.81	259.3	245.8	245.36	248	250.8	253.3	2220	2329	2599	3035	3814	4286	4660	5053	5383
Shandong	8337.47	9195.04	10275.5	12078.1	15021.8	18366.9	21900.2	25776.9	30933.3	33896.7	39169.9	45361.8	50013.2	55230.3	59426.6	63002.3	68024.5	72634.1	66648.9	70540.5	243.98	251.57	252.37	219.355	214.88	211.03	225.823	219.547	219.89	219.993	222.468	224.05	221.791	217.938	214.52	212.8	213.992	209.5	212.7	225.3	8203	9955	11048	13034	19623.7	24162	26759	29177	30570
Henan	5052.99	5533.01	6035.48	6867.7	8553.79	10587.4	12362.8	15012.5	18018.5	19480.5	23092.4	26931	29599.3	32191.3	34938.2	37002.2	40471.8	44552.8	49935.9	53717.8	204.7	231.4	218.809	187.619	200.7	197.78	226.978	209.283	227.53	233.713	224.607	229.04	238.605	240.568	209.291	222.8	227.643	233.8	234.6	237.8	7876	8244	8603	9562	13074.2	14625	16232	17838	18976
Hubei	3545.39	3880.53	4212.82	4757.45	5633.24	6590.19	7617.47	9333.4	11328.9	12961.1	15967.6	19632.3	22250.5	24791.8	27379.2	29550.2	32665.4	35478.1	42021.9	45429	270.6	278.54	240.86	245.065	242.67	253.38	258.792	258.731	270.71	281.406	287.993	296.7	299.293	291.8	288.34	301.3	281.966	290.3	296.9	303.2	6269	6052	6713	7645	9120	10082	11049	12143	12845
Hunan	3551.49	3831.9	4151.54	4659.99	5641.94	6596.1	7688.67	9439.6	11555	13059.7	16038	19669.6	22154.2	24621.7	27037.3	28902.2	31551.4	33903	36329.7	39894.1	315.96	318.55	306.91	318.844	323.62	328.44	327.727	324.262	323.62	322.334	325.173	326.5	328.8	332.489	332.413	330.4	330.363	326.9	337	333	4071	4622	5045	5562	7599.2	9709	10581	11629	12355
Guangdong	10741.2	12039.2	13502.4	15844.6	18864.6	22557.4	26587.8	31777	36796.7	39482.6	46013.1	53210.3	57067.9	62474.8	67809.9	72812.6	80854.9	89705.2	99944.7	107987	429.77	446.33	447.03	457.53	464.8	458.95	459.4	462.51	461.53	463.407	469.013	464.2	451.018	443.162	442.538	443.1	434.965	433.5	420.9	412.3	9448	10179	11355	13099	15210.5	17921	19971	22217	23476
Guangxi	2080.04	2279.34	2523.73	2821.11	3433.5	3984.1	4746.16	5823.41	7021	7759.16	9569.85	11720.9	13035.1	14449.9	15672.9	16803.1	18317.6	18523.3	19627.8	21237.1	292.5	291.07	297.47	278.377	290.81	312.86	314.422	310.406	310.1	303.359	301.579	302.72	303.015	308.165	307.601	299.3	290.565	284.9	287.8	283.4	2669	2669	2982	3421	4203.28	4869	5390	5997	6497
Hainan	526.82	579.17	642.73	713.96	819.66	918.75	1065.67	1254.17	1503.06	1654.21	2064.5	2522.66	2855.54	3177.56	3500.72	3702.76	4053.2	4462.54	4910.69	5330.8	44.01	43.56	44.09	46.3112	46.3	44.05	46.46	46.69	46.89	44.46	44.35	224.05	45.33	43.16	45.022	45.8	44.9615	45.6	45.1	46.4	480	520	742.48	796	742.48	822	920	1057	1135
Chongqing	1791	1976.86	2232.86	2555.72	3034.58	3467.72	3907.23	4676.13	5793.66	6530.01	7925.58	10011.4	11409.6	12783.3	14262.6	15717.3	17740.6	19424.7	21589	23605.8	56.33	57.41	60.3	63.1682	67.45	71.16	73.2013	77.4281	82.77	85.3032	86.3866	86.7976	82.936	83.902	80.4687	79	77.483	77.4	77.2	76.5	4023	3016	3204	2972	3670	4943	5368	5947	6472
Sichuan	3928.2	4293.49	4725.01	5333.09	6379.63	7385.11	8690.24	10562.4	12601.2	14151.3	17185.5	21026.7	23872.8	26392.1	28536.7	30053.1	32934.5	36980.2	42902.1	46363.8	208.53	207.84	208.61	209.86	210.35	212.3	215.132	213.98	207.64	223.46	230.27	233.47	245.921	242.474	236.87	265.5	267.256	268.4	259.1	252.4	6517.82	6810	7510	9204	10700	11816	12986	14214	15145
Guizhou	1029.92	1133.27	1243.43	1426.34	1677.8	2005.42	2338.98	2884.11	3561.56	3912.68	4602.16	5701.84	6852.2	8086.86	9266.39	10502.6	11776.7	13540.8	15353.2	16769.3	84.16	87.16	89.94	93.7	94.31	97.22	99.9748	98.0252	101.89	100.379	101.447	95.08	100.818	91.9961	95.3074	97.5	100.313	103.5	106.8	108.1	4325	4438	4470	5542	6021	5641	6172	6800	7084
Yunnan	2011.19	2138.31	2312.82	2556.02	3081.91	3462.73	3988.14	4772.52	5692.12	6169.75	7224.18	8893.12	10309.5	11832.3	12814.6	13619.2	14788.4	16376.3	20881	23223.8	147.11	146.21	148.499	146.086	146.92	146.82	144.766	150.025	153.14	152.639	147.475	147	151.827	149.713	149.415	150.1	150.244	156.6	155.7	154.9	3207	3490	3939	4151	5209.81	6024	6621	7133	7511
Shanxi	1804	2010.62	2253.39	2587.72	3175.58	3933.72	4743.61	5757.29	7314.58	8169.8	10123.5	12512.3	14453.7	16205.5	17689.9	18021.9	19399.6	21898.8	23941.9	25793.2	78.66	77.88	78.01	75.08	75.53	78.76	84.08	81.5453	85.46	84.3403	83.3977	87.76	88.0397	89.2074	89.8103	91.2	90.8287	93	93.7	92.6	2731	3257	3713	3952	4775.96	5571	6129	6775	7417
Gansu	1052.88	1125.37	1232.03	1399.83	1688.49	1933.98	2277.35	2703.98	3166.82	3387.56	4120.75	5020.37	5650.2	6330.69	6836.82	6790.32	7200.37	7459.9	8104.07	8718.3	122.73	121.38	122.643	121.567	121.75	122.97	122.333	122.502	122.17	120.626	121.824	122.886	123.05	121.99	120.573	119.2	118.35	116.1	112.3	110	3012	2905	3018	3525	3907.74	4368	4743	5109	5346
Qinghai	263.68	300.13	340.65	390.21	466.1	543.32	648.5	797.35	1018.62	1081.27	1350.43	1670.44	1893.54	2122.06	2303.32	2417.05	2572.49	2624.83	2748	2941.1	27.87	27.23	27.0247	29.0098	30.16	30.65	32.2015	31.1089	34.36	28.7617	30.7736	36.6	27.4	28.2022	26.3446	26.8	26.3995	25.8	26.1	26.2	879	930	1019	1123	1364.4	1670	1903	2095	2279
Ningxia	295.02	337.44	377.16	445.36	537.11	612.61	725.9	919.11	1203.92	1353.31	1689.65	2102.21	2341.29	2577.57	2752.1	2911.77	3168.59	3443.56	3510.21	3748.48	87.23	84.23	81.523	64.02	74.04	78.09	77.629	71.002	74.18	72.234	72.37	73.587	69.35	72.127	70.313	70.4	64.891	66.1	66.2	69.9	1179.43	1605.6	1801.7	2598	2322.23	2536	2830	3077	3229
Xinjiang	1363.56	1491.6	1612.65	1886.35	2209.09	2604.19	3045.26	3523.16	4183.21	4277.05	5437.47	6610.05	7505.31	8443.84	9273.46	9324.8	9649.7	10882	12809.4	13597.1	479.95	487.14	474.556	500.671	497.06	508.48	513.43	517.74	528.22	530.903	535.076	523.51	590.138	588.036	581.817	577.2	565.376	552.3	548.8	587.7	3316	3496	3622	4037	4909.66	5506	6047	6576	7069
[truncated: 92 more columns]

## Sheet: China' drag effects (2001-2019)
Year	Energy growth drag	Water growth drag	Energy-water growth drag
2001	-0.0699159	-0.0337424	-0.103658
2002	-0.00695176	0.018075	0.0111232
2003	0.259118	0.231144	0.490262
2004	0.126215	0.130106	0.256322
2005	-0.00196478	0.0282308	0.0262661
2006	0.0423477	0.0448386	0.0871863
2007	0.0622998	0.0662829	0.128583
2008	0.141618	0.108226	0.249844
2009	0.141218	0.108289	0.249506
2010	0.0686126	0.063948	0.132561
2011	0.13236	0.0887458	0.221106
2012	0.0905491	0.0680915	0.158641
2013	-0.0105877	0.000720863	-0.00986688
2014	0.0681878	0.0328889	0.101077
2015	0.225297	0.131517	0.356814
2016	0.0484913	0.0354398	0.0839311
2017	-0.00259845	0.00359062	0.000992174
2018	0.0327241	0.0279925	0.0607166
2019	0.00190706	0.00841371	0.0103208

## Sheet: Each province' growth drag
Region	Energy growth drag	Water growth drag	Energy-water growth drag
Beijing	0.119396	0.100903	0.09289
Tianjin	0.129111	0.11752	0.12186
Hebei	0.118197	0.0954778	0.09635
Shanxi	0.123123	0.0989287	0.09363
Inner Mongolia	0.0868386	0.0968547	0.12521
Liaoning	0.108713	0.100405	0.09204
Jilin	0.122469	0.07937	0.1016
Heilongjiang	0.116952	0.0972176	0.09228
Shanghai	0.123256	0.117077	0.0923
Jiangsu	0.14332	0.135869	0.10895
Zhejiang	0.153314	0.14605	0.10174
Anhui	0.163601	0.156898	0.10731
Fujian	0.150933	0.154265	0.11036
Jiangxi	0.10969	0.104247	0.11044
Shandong	0.11353	0.114693	0.10771
Henan	0.142612	0.150783	0.10527
Hubei	0.137581	0.129033	0.10776
Hunan	0.11073	0.118602	0.10637
Guangdong	0.186319	0.173864	0.10257
Guangxi	0.136888	0.126016	0.10549
Hainan	0.127123	0.0965788	0.0984
Chongqing	0.139321	0.133544	0.11805
Sichuan	0.112366	0.110922	0.10961
Guizhou	0.119995	0.0985084	0.11117
Yunnan	0.111475	0.101931	0.10212
Shanxi	0.11763	0.108704	0.11104
Gansu	0.106384	0.0940121	0.09666
Qinghai	0.17545	0.10595	0.1084
Ningxia	0.135547	0.132641	0.1031
Xinjiang	0.103375	0.0812707	0.09624

## Sheet: Scenario forefast data
Baseline scenario	Year	Total energy consumption(10 thousand Tce)	Total water supply(100 million Cbm)
	2020	498000	5812.9
	2021	507991	5925.84
	2022	518182	6040.98
	2023	528578	6158.36
	2024	539183	6278.02
	2025	550000	6400
	2026	560344	6498.54
	2027	570883	6620.43
	2028	581620	6744.61
	2029	592559	6871.12
	2030	600000	7000
Strong carbon control scenario	Year	Total energy consumption(10 thousand Tce)	Total water supply(100 million Cbm)
	2020	498000	5812.9
	2021	507992	5925.84
	2022	518183	6040.98
	2023	528579	6158.36
	2024	539184	6278.02
	2025	550000	6400
	2026	557590	6498.54
	2027	565285	6620.43
	2028	573086	6744.61
	2029	580994	6871.12
	2030	589012	7000
Weak carbon control scenario	Year	Total energy consumption(10 thousand Tce)	Total water supply(100 million Cbm)
	2020	498000	5812.9
	2021	507993	5925.84
	2022	518184	6040.98
	2023	528580	6158.36
	2024	539185	6278.02
	2025	550000	6400
	2026	565367	6498.54
	2027	580360	6620.43
	2028	595751	6744.61
	2029	611551	6871.12
	2030	656000	7000
